# Supplementary material
Source: MDPI journal article supplement (https://www.mdpi.com/search?q=applsci-10-05205)
Supplement: s001 [file applsci-10-05205-s001.pdf]

Review

# Low-Frequency Noise and Its Main Effects on Human Health—A Review of the Literature between 2016 and 2019

Juliana Araújo Alves 1,\*<sup>1</sup>, Filipa Neto Paiva 2, Lígia Torres Silva 2 and Paula Remoaldo 1

<sup>1</sup> Lab2PT–Landscape, Heritage and Territory Laboratory, University of Minho, 4710-057 Braga, Portugal; premoaldo@geografia.uminho.pt

<sup>2</sup> CTAC–Centre for Territory, Environment and Construction, University of Minho, 4800-058 Guimarães, Portugal; filipa\_paiva@sapo.pt (F.N.P.); lsilva@civil.uminho.pt (L.T.S.)

\* Correspondence: jalves.geografia@gmail.com

Received: 5 July 2020; Accepted: 27 July 2020; Published: date

Abbasi, A. M., Motamedzade, M., Aliabadi, M., Golmohammadi, R., & Tapak, L. (2018). Study of the physiological and mental health effects caused by exposure to low-frequency noise in a simulated control room. *Building Acoustics*, 25(3), 233–248. <https://doi.org/10.1177/1351010X18779518>

Abbasi, M., Monazzam, M. R., Zakerian, S. A., Ebrahimi, M. H., Dehghan, S. F., & Akbarzadeh, A. (2016). Assessment of noise effects of wind turbine on the general health of staff at wind farm of Manjil, Iran. *Journal of Low Frequency Noise Vibration and Active Control*, 35(1), 91–98. <https://doi.org/10.1177/0263092316628714>

Aleknaite, M., & Grubliauskas, R. (2018). Assessment and evaluation of railway noise spread dependence on different types of sleepers. *Energy Procedia*, 147, 249–257. <https://doi.org/10.1016/j.egypro.2018.07.089>

Alimohammadi, I., & Ebrahimi, H. (2017). Comparison between effects of low and high frequency noise on mental performance. *Applied Acoustics*, 126, 131–135. <https://doi.org/10.1016/j.apacoust.2017.05.021>

Alves, J. A., Silva, L. T., & Remoaldo, P. (2019). How can low-frequency noise exposure interact with the well-being of a population? Some results from a Portuguese municipality. *Applied Sciences (Switzerland)*, 9(24). <https://doi.org/10.3390/app9245566>

Alves, J. A., Silva, L. T., & Remoaldo, P. C. (2018). Impacts of low frequency noise exposure on well-being: A case-study from Portugal. *Noise and Health*, 20(95), 131–145.

Alves-pereira, M., Krogh, C., Summers, S. R., & Rapley, B. I. (2018). Infrasound and low frequency noise guide- lines: antiquated and irrelevant for protect- ing populations. In 26th International Congress on Sound and Vibration (pp. 1–8).

An, J., & Chung, W. Y. (2018). Wavelength-division multiplexing optical transmission for EMI-free indoor fine particulate matter monitoring. *IEEE Access*, 6, 74885–74894. <https://doi.org/10.1109/ACCESS.2018.2882576>

Babisch, W. (2019). Cardiovascular Effects of Noise. *Encyclopedia of Environmental Health (Second Edition)*, 543–552.

Baguley, D. M., Cope, T. E., & McFerran, D. J. (2016). Functional auditory disorders. *Handbook of Clinical Neurology*, 139(94), 367–378. <https://doi.org/10.1016/B978-0-12-801772-2.00032-1>

Baliatsas, C., van Kamp, I., van Poll, R., & Yzermans, J. (2016). Health effects from low-frequency noise and infrasound in the general population: Is it time to listen? A systematic review of observational studies. *Science of the Total Environment*, 557–558, 163–169. <https://doi.org/10.1016/j.scitotenv.2016.03.065>

Bitar, D., Gourdon, E., Lamarque, C. H., & Collet, M. (2019). Shunt loudspeaker using nonlinear energy sink. *Journal of Sound and Vibration*, 456, 254–271. <https://doi.org/10.1016/j.jsv.2019.05.021>

Blair, B. D., Brindley, S., Dinkelloo, E., McKenzie, L. M., & Adgate, J. L. (2018). Residential noise from nearby oil and gas well construction and drilling. *Journal of Exposure Science and Environmental Epidemiology*, 28(6), 538–547. <https://doi.org/10.1038/s41370-018-0039-8>

Botteldooren, D. (2019). Measuring Noise for Health Impact Assessment. *Encyclopedia of Environmental Health (Second Edition)*, 257–265.

Boyle, M. D., Soneja, S., Quiros-Alcala, L., Dalemarre, L., Sapkota, A. R., Sangaramoorthy, T., ... Sapkota, A. (2017). A pilot study to assess residential noise exposure near natural gas compressor stations. *PLoS ONE*, 12(4), 1–15. <https://doi.org/10.1371/journal.pone.0174310>

Bozorgi, A., Ghorbaniasl, G., & Nourbakhsh, S. A. (2019). The reduction in low-frequency noise of horizontal-axis wind turbines by adjusting blade cone angle. *International Journal of Environmental Science and Technology*, 16(6), 2573–2586. <https://doi.org/10.1007/s13762-017-1639-x>

Butkeviciute, E., Bikulciene, L., & Poderiene, K. (2018). Training system methodology using ECG signal. *IFMBE Proceedings*, 66, 261–265.

Caniato, M., Bettarello, F., Schmid, C., & Fausti, P. (2016). Assessment criterion for indoor noise disturbance in the presence of low frequency sources. *Applied Acoustics*, 113, 22–33. <https://doi.org/10.1016/j.apacoust.2016.06.001>

Cao, H., Kang, T., & Chen, X. (2019). Noise analysis and sources identification in machine tool spindles. *CIRP Journal of Manufacturing Science and Technology*, 25, 26–35. <https://doi.org/10.1016/j.cirpj.2019.04.001>

Chalansonnet, M., Carreres-Pons, M., Venet, T., Thomas, A., Merlen, L., Seidel, C., ... Campo, P. (2018). Combined exposure to carbon disulfide and low-frequency noise reversibly affects vestibular function. *NeuroToxicology (Vol. 67)*. Elsevier B.V. <https://doi.org/10.1016/j.neuro.2018.06.010>

Chang, T. Y., Liang, C. H., Wu, C. F., & Chang, L. Te. (2019). Application of land-use regression models to estimate sound pressure levels and frequency components of road traffic noise in Taichung, Taiwan. *Environment International*, 131(July), 104959. <https://doi.org/10.1016/j.envint.2019.104959>

Chen, A., & Kurfess, T. R. (2019). Signal processing techniques for rolling element bearing spall size estimation. *Mechanical Systems and Signal Processing*, 117, 16–32. <https://doi.org/10.1016/j.ymssp.2018.03.006>

Chen, K., Zhang, H., & Zhang, W. (2018). Measures to alleviate fume hood noise. *American Laboratory*, 50(3), 10–13.

Chiu, C. H., & Lung, S. C. C. (2019). Exposure to low frequency noise from wind turbines in indoor environments of different building materials. *Proceedings of the Air and Waste Management Association's Annual Conference and Exhibition, AWMA, 2019-June*.

Colaço, A., Alves Costa, P., Amado-Mendes, P., Magalhães, F., & Godinho, L. (2018). Experimental validation of a FEM-MFS hybrid numerical approach for vibro-acoustic prediction. *Applied Acoustics*, 141(January), 79–92. <https://doi.org/10.1016/j.apacoust.2018.06.018>

Deshmukh, S., Bhattacharya, S., Jain, A., & Paul, A. R. (2019). Wind turbine noise and its mitigation techniques: A review. *Energy Procedia*, 160(2018), 633–640. <https://doi.org/10.1016/j.egypro.2019.02.215>

Fabris, C. (2018). Low frequency noise - The long way of amending the German standard for measurement and rating LFN. *INTER-NOISE 2018 - 47th International Congress and Exposition on Noise Control Engineering: Impact of Noise Control Engineering*.

Freiberg, A., Scheffer, C., Girbig, M., Murta, V. C., & Seidler, A. (2019). Health effects of wind turbines on humans in residential settings: Results of a scoping review. *Environmental Research*, 169(August 2018), 446–463. <https://doi.org/10.1016/j.envres.2018.11.032>

Galindo, A. P. G., Caicedo, Y. C., & Vélez-Pereira, A. M. (2017). Noise level in a neonatal intensive care unit in Santa Marta - Columbia, 48(5), 119–124.

Giraldo-Guzmán, J., Contretas-Ortiz, S. H., Lasprilla, G. I. B., & Kotas, M. (2017). Fetal ECG extraction using independent component analysis by Jade approach. *Proceedings of SPIE – The International Society for Optical Engineering*.

Han, H., Wang, J., Meng, X., & Liu, H. (2016). Analysis of the dynamic response of a long span bridge using GPS/accelerometer/anemometer under typhoon loading. *Engineering Structures*, 122, 238–250. <https://doi.org/10.1016/j.engstruct.2016.04.041>

Hansen, K. L., Nguyen, P., Zajamšek, B., Catcheside, P., & Hansen, C. H. (2019). Prevalence of wind farm amplitude modulation at long-range residential locations. *Journal of Sound and Vibration*, 455, 136–149. <https://doi.org/10.1016/j.jsv.2019.05.008>

Haron, Z., Jamaludin, J., Darus, N., Yahya, K., Jahya, Z., Mashros, N., & Hezmi, M. A. (2019). A case study of acoustic efficiency of existing noise barrier in reducing road traffic noise in school area. *IOP Conference Series: Earth and Environmental Science*, 220(1). <https://doi.org/10.1088/1755-1315/220/1/012046>

Hashem, I., Mohamed, M. H., & Hafiz, A. A. (2017). Aero-acoustics noise assessment for Wind-Lens turbine. *Energy*, 118, 345–368. <https://doi.org/10.1016/j.energy.2016.12.049>

Hays, J., McCawley, M., & Shonkoff, S. B. C. (2017). Public health implications of environmental noise associated with unconventional oil and gas development. *Science of the Total Environment*, 580, 448–456. <https://doi.org/10.1016/j.scitotenv.2016.11.118>

Hessler, G., Leventhall, G., Schomer, P., & Walker, B. (2017). Health effects from wind turbine low frequency noise & infrasound: Do wind turbines make people sick? That is the issue. *Sound and Vibration*, 51(1), 34–44.

Ho, C. Y., Shyu, K. K., Chang, C. Y., & Kuo, S. M. (2018). Integrated active noise control for open-fit hearing aids with customized filter. *Applied Acoustics*, 137(November 2017), 1–8. <https://doi.org/10.1016/j.apacoust.2018.02.025>

Hong, K., Huang, H., Fu, Y., & Zhou, J. (2016). A vibration measurement system for health monitoring of power transformers. *Measurement: Journal of the International Measurement Confederation*, 93, 135–147. <https://doi.org/10.1016/j.measurement.2016.07.002>

Höstmad, P., Forssén, J., Bergman, P., & Fredriksson, K. (2016). Off-peak low noise heavy-duty vehicles, facade insulation and indoor noise disturbance. *Proceedings of the INTER-NOISE 2016 - 45th International Congress and Exposition on Noise Control Engineering: Towards a Quieter Future*, 5258–5266.

Hu, C. song, & Tkebuchava, T. (2019). E-noise: An increasingly relevant health risk. *Journal of Integrative Medicine*, 17(5), 311–314. <https://doi.org/10.1016/j.joim.2019.07.003>

Huang, B., Pan, Z., Liu, Z., Hou, G., & Yang, H. (2017). Acoustic amenity analysis for high-rise building along urban expressway: Modeling traffic noise vertical propagation using neural networks. *Transportation Research Part D: Transport and Environment*, 53, 63–77. <https://doi.org/10.1016/j.trd.2017.04.001>

Hygge, S. (2019). Noise and Cognition in Children. *Encyclopedia of Environmental Health (Second Edition)*, 655–660.

Ishitake, T. (2018). Wind Turbine Noise and Health Effects, 298–304.

Ishitake, T., & Hara, K. (2018). Current Situation around Wind Power Generation and Health Effects of Wind Turbine Noise. *Nihon Eiseigaku Zasshi. Japanese Journal of Hygiene*, 73(3), 277. <https://doi.org/10.1265/jjh.73.277>

Iyendo, T. O. (2016). Exploring the effect of sound and music on health in hospital settings: A narrative review. *International Journal of Nursing Studies*, 63, 82–100. <https://doi.org/10.1016/j.ijnurstu.2016.08.008>

Jafari, Z., Kolb, B. E., & Mohajerani, M. H. (2019). Noise exposure accelerates the risk of cognitive impairment and Alzheimer's disease: Adulthood, gestational, and prenatal mechanistic evidence from animal studies. *Neuroscience and Biobehavioral Reviews*, (April), 0–1. <https://doi.org/10.1016/j.neubiorev.2019.04.001>

Jaiswal, M., Srivastava, A., & Siddiqui, T. J. (2019). Recent Trends in Communication, Computing, and Electronics. *Proceedings of IC3E 2018 (Vol. 524)*. Springer Singapore. <https://doi.org/10.1007/978-981-13-2685-1>

Jalali, L., Nezhad-Ahmadi, M. R., Gohari, M., Bigelow, P., & McColl, S. (2016). The impact of psychological factors on self-reported sleep disturbance among people living in the vicinity of wind turbines. *Environmental Research*, 148, 401–410. <https://doi.org/10.1016/j.envres.2016.04.020>

Kalle, S., & Paju, J. (2016). Comparative study of the noise levels: Impact of renovation. *Agronomy Research*, 14(4), 1300–1306.

Keränen, J., Hakala, J., & Hongisto, V. (2019). The sound insulation of façades at frequencies 5–5000 Hz. *Building and Environment*, 156(April), 12–20. <https://doi.org/10.1016/j.buildenv.2019.03.061>

Kim, E. S., & Chung, J. B. (2019). The memory of place disruption, senses, and local opposition to Korean wind farms. *Energy Policy*, 131(May), 43–52. <https://doi.org/10.1016/j.enpol.2019.04.011>

Klæboe, R. (2019). Noise and health: Annoyance and interference. *Encyclopedia of Environmental Health*, 661–672. <https://doi.org/10.1016/B978-0-444-63951-6.00242-4>

Knabben, R. M., Trichês, G., Vergara, E. F., Gerges, S. N. Y., & van Keulen, W. (2019). Characterization of tire-road noise from Brazilian roads using the CPX trailer method. *Applied Acoustics*, 151, 206–214. <https://doi.org/10.1016/j.apacoust.2019.03.013>

Kumar, K. B., & Thomas, M. J. (2016). Computation of audible noise from a 1200 kV UHV power transmission line. *IEEE Transactions on Dielectrics and Electrical Insulation*, 23(2), 974–978. <https://doi.org/10.1109/TDEI.2016.005146>

Kuparowitz, T., Sedlakova, V., Sedlak, P., & Sikula, J. (2017). Low frequency noise of electrochemical power sources. 2017 International Conference on Noise and Fluctuations, ICNF 2017, 2020(687306), 6–9. <https://doi.org/10.1109/ICNF.2017.7985993>

Laib, F., Braun, A., & Rid, W. (2019). Modelling noise reductions using electric buses in urban traffic. A case study from Stuttgart, Germany. *Transportation Research Procedia*, 37(September 2018), 377–384. <https://doi.org/10.1016/j.trpro.2018.12.206>

Lee, P. J., Park, S. H., Jeong, J. H., Choung, T., & Kim, K. Y. (2019). Association between transportation noise and blood pressure in adults living in multi-storey residential buildings. *Environment International*, 132(April), 105101. <https://doi.org/10.1016/j.envint.2019.105101>

Lercher, P. (2018). Combined transportation noise exposure in residential areas. *Encyclopedia of Environmental Health* (2nd ed.). Elsevier Inc. <https://doi.org/10.1016/B978-0-12-409548-9.11280-1>

Li, H., Li, L., Zhang, K., Chen, M., Fan, X., Liu, Y., ... Shen, Y. (2019). A case study of noise pollution and its control in an Eco-friendly 500 kV substation, 23(201804270000144), 3336–3340.

Li, J., Zhang, J., Li, M., & Zhang, Y. (2019). A novel adaptive stochastic resonance method based on coupled bistable systems and its application in rolling bearing fault diagnosis. *Mechanical Systems and Signal Processing*, 114, 128–145. <https://doi.org/10.1016/j.ymssp.2018.05.004>

Licitra, G., Fredianelli, L., Petri, D., & Vigotti, M. A. (2016). Annoyance evaluation due to overall railway noise and vibration in Pisa urban areas. *Science of the Total Environment*, 568, 1315–1325. <https://doi.org/10.1016/j.scitotenv.2015.11.071>

Liebich, S., Fabry, J., Jax, P., & Vary, P. (2017). Time-domain Kalman filter for Active Noise Cancellation headphones. 25th European Signal Processing Conference, EUSIPCO 2017, 2017-Janua, 593–597. <https://doi.org/10.23919/EUSIPCO.2017.8081276>

Lin, I. C., Hsieh, J. S., Chang, N. R., Hsieh, P. F., & Tsai, H. T. (2018). Development and regulations on noise control of the Republic of China (Taiwan). INTER-NOISE 2018 - 47th International Congress and Exposition on Noise Control Engineering: Impact of Noise Control Engineering.

Liu, C. S., Young, L. H., Yu, T. Y., Bao, B. Y., & Chang, T. Y. (2016). Occupational noise frequencies and the incidence of hypertension in a retrospective cohort study. *American Journal of Epidemiology*, 184(2), 120–128. <https://doi.org/10.1093/aje/kwv333>

Liu, L., Qin, J., Lei, X., Liu, Q., & Song, R. (2018). A study on optimization of the structure-borne noise from a trough girder based on response surface methodology. *Zhendong Yu Chongji/Journal of Vibration and Shock*, 37(20), 56–60 and 80.

Liu, L., Qin, J., Lei, X., Liu, Q., Song, R., & Zeng, F. (2018). Low frequency noise of a trough girder structure based on acoustic transfer vector method. *Zhendong Yu Chongji/Journal of Vibration and Shock*, 37(19), 132–138 and 152.

Liu, L., & Xu, D. (2016). Structural noise radiation characteristics of box beams with web holes. *Journal of Vibration and Shock*, 35(15), 204–210.

Liu, L.-Y., & Xu, D.-T. (2016). Effect of rail transit box-girder with web opening on the structure noise radiation. *Civil Engineering and Urban Planning IV - Proceedings of the 4th International Conference on Civil Engineering and Urban Planning*, 895–898.

Loupa, G., Katikaridis, A., Karali, D., & Rapsomanikis, S. (2019). Mapping the noise in a Greek general hospital. *Science of the Total Environment*, 646, 923–929. <https://doi.org/10.1016/j.scitotenv.2018.07.315>

Luo, C., Fang, S., Zha, Z., Han, Q., Yao, W., Hua, X., ... Zhang, X. (2017). Research on Distribution Characteristics of Electromagnetic Field and Attenuation Law of Pure Sound for UHV AC Transmission Line. *Gaoya Dianqi/High Voltage Apparatus*, 53(8), 94–99.

Mancera, K. F., Lisle, A., Allavena, R., & Phillips, C. J. C. (2017). The effects of mining machinery noise of different frequencies on the behaviour, faecal corticosterone and tissue morphology of wild mice (*Mus musculus*). *Applied Animal Behaviour Science*, 197(August 2016), 81–89. <https://doi.org/10.1016/j.applanim.2017.08.008>

Manzano, E. A., & Tafur, J. (2018). Optimal Step Size for a Delayed FxLMS Algorithm applied in a Prototype of Active Noise Control System. *IEEE International Conference on Control and Automation, ICCA, 2018-June*, 935–940. <https://doi.org/10.1109/ICCA.2018.8444184>

Mavrin, V., Makarova, I., & Prikhodko, A. (2018). Assessment of the influence of the noise level of road transport on the state of the environment. *Transportation Research Procedia*, 36(SPbOTSIC), 514–519. <https://doi.org/10.1016/j.trpro.2018.12.138>

Milne, D., Le Pen, L., Watson, G., Thompson, D., Powrie, W., Hayward, M., & Morley, S. (2016). Proving MEMS Technologies for Smarter Railway Infrastructure. *Procedia Engineering*, 143(Ictg), 1077–1084. <https://doi.org/10.1016/j.proeng.2016.06.222>

Min, J. young, & Min, K. bok. (2018). Cumulative exposure to nighttime environmental noise and the incidence of peptic ulcer. *Environment International*, 121(August), 1172–1178. <https://doi.org/10.1016/j.envint.2018.10.035>

Mirshelarloo, M. S., Tan, C. Y., Yu, X., Zhang, L., Chen, S., Yao, K., ... Tan, S. T. (2017). Active noise mitigation window employing transparent piezoelectric film speakers. *INTER-NOISE 2017 – 46th International Congress and Exposition on Noise Control Engineering: Taming Noise and Moving Quiet, 2017-January*.

Mohamed, M. H. (2016). Reduction of the generated aero-acoustics noise of a vertical axis wind turbine using CFD (Computational Fluid Dynamics) techniques. *Energy*, 96, 531–544. <https://doi.org/10.1016/j.energy.2015.12.100>

Monteiro, R. P., Lima, G. A., Oliveira, J. P. G., Cunha, D. S. C., & Bastos-Filho, C. J. A. (2018). Improving adaptive filters for active noise control using particle swarm optimization. *International Journal of Swarm Intelligence Research*, 9(4), 47–64. <https://doi.org/10.4018/IJSIR.2018100103>

Moradi, G., Omid, L., Vosoughi, S., Ebrahimi, H., Alizadeh, A., & Alimohammadi, I. (2019). Effects of noise on selective attention: The role of introversion and extraversion. *Applied Acoustics*, 146, 213–217. <https://doi.org/10.1016/j.apacoust.2018.11.029>

Morsing, J. A., Smith, M. G., Ögren, M., Thorsson, P., Pedersen, E., Forssén, J., & Waye, K. P. (2018). Wind turbine noise and sleep: Pilot studies on the influence of noise characteristics. *International Journal of Environmental Research and Public Health*, 15(11). <https://doi.org/10.3390/ijerph15112573>

Munir, M. W., Abdulla, W., Ardekani, I., & Patel, N. (2017). Physical classification and recent developments of active noise control systems. *ACM International Conference Proceeding Series*, 180–187. <https://doi.org/10.1145/3163080.3163099>

Muzet, A. (2019). Sleep Disturbance in Adults by Noise. *Encyclopedia of Environmental Health (Second Edition)*, 677–681.

Negishi-Oshino, R., Ohgami, N., He, T., Li, X., Kato, M., Kobayashi, M., ... Kato, M. (2019). Heat shock protein 70 is a key molecule to rescue imbalance caused by low-frequency noise. *Archives of Toxicology*, 93(11), 3219–3228. <https://doi.org/10.1007/s00204-019-02587-3>

Ninomiya, H., Ohgami, N., Oshino, R., Kato, M., Ohgami, K., Li, X., ... Kato, M. (2018). Increased expression level of Hsp70 in the inner ears of mice by exposure to low frequency noise. *Hearing Research*, 363, 49–54. <https://doi.org/10.1016/j.heares.2018.02.006>

Ohgami, N., Oshino, R., Ninomiya, H., Li, X., & Kato, M. (2017). Impairments of Inner Ears Caused by Physical Environmental Stresses. *Nihon Eiseigaku Zasshi. Japanese Journal of Hygiene*, 72(1), 38–42. <https://doi.org/10.1265/jjh.72.38>

Otčenášek, J. (2019). Environmental aircraft take-off noise – Sound quality factors associated with unpleasantness. *Transportation Research Part D: Transport and Environment*, 67, 366–374. <https://doi.org/10.1016/j.trd.2018.10.014>

Pan, J., Paurobally, R., & Qiu, X. (2016). Active Noise Control in Workplaces. *Acoustics Australia*, 44(1), 45–50. <https://doi.org/10.1007/s40857-015-0035-2>

Paunović, K., Jakovljević, B., & Stojanov, V. (2018). The timeline of blood pressure changes and hemodynamic responses during an experimental noise exposure. *Environmental Research*, 163(January), 249–262. <https://doi.org/10.1016/j.envres.2018.01.048>

Peng, P., Hu, H., Shao, Y., Luo, X., Liu, Y., Zhang, N., & Wang, Y. (2019). Design and optimization of damping materials for power equipment based on material gene engineering technology. *Energy Procedia*, 158, 6632–6636. <https://doi.org/10.1016/j.egypro.2019.01.042>

Phadke, K. V., Abo-Hasseba, A., Švec, J. G., & Geneid, A. (2019). Influence of Noise Resulting From the Location and Conditions of Classrooms and Schools in Upper Egypt on Teachers' Voices. *Journal of Voice*, 33(5), 802.e1–802.e9. <https://doi.org/10.1016/j.jvoice.2018.03.003>

Pohl, J., Gabriel, J., & Hübner, G. (2018). Understanding stress effects of wind turbine noise – The integrated approach. *Energy Policy*, 112(August 2017), 119–128. <https://doi.org/10.1016/j.enpol.2017.10.007>

Pokamisas, S., Baxevanakis, D., & Sotiriadis, P. P. (2019). A 0.6V, 700nW Chopper Capacitively-Coupled Instrumentation Amplifier for Biomedical Applications. 2019 8th International Conference on Modern Circuits and Systems Technologies, MOCAS 2019, (7), 1 – 4. <https://doi.org/10.1109/MOCAS.2019.8741847>

Poulsen, A. H., Raaschou-Nielsen, O., Peña, A., Hahmann, A. N., Nordsborg, R. B., Ketzel, M., ... Sørensen, M. (2019a). Impact of long-term exposure to wind turbine noise on redemption of sleep medication and antidepressants: A nationwide cohort study. *Environmental Health Perspectives*, 127(3), 1–9. <https://doi.org/10.1289/EHP3909>

Poulsen, A. H., Raaschou-Nielsen, O., Peña, A., Hahmann, A. N., Nordsborg, R. B., Ketzel, M., ... Sørensen, M. (2019b). Long-term exposure to wind turbine noise and risk for myocardial infarction and stroke: A nationwide cohort study. *Environmental Health Perspectives*, 127(3), 1–10. <https://doi.org/10.1289/EHP3340>

Rossi, L., Prato, A., Lesina, L., & Schiavi, A. (2018). Effects of low-frequency noise on human cognitive performances in laboratory. *Building Acoustics*, 25(1), 17–33. <https://doi.org/10.1177/1351010X18756800>

Scanlon, J. E. M., Townsend, K. A., Cormier, D. L., Kuziek, J. W. P., & Mathewson, K. E. (2019). Taking off the training wheels: Measuring auditory P3 during outdoor cycling using an active wet EEG system. *Brain Research*, 1716, 50–61. <https://doi.org/10.1016/j.brainres.2017.12.010>

Scherer, R. W., & Formby, C. (2019). Effect of Tinnitus Retraining Therapy vs Standard of Care on Tinnitus-Related Quality of Life: A Randomized Clinical Trial. *JAMA Otolaryngology - Head and Neck Surgery*, 145(7), 597–608. <https://doi.org/10.1001/jamaoto.2019.0821>

Selander, J., Albin, M., Rosenhall, U., Rylander, L., Lewné, M., & Gustavsson, P. (2016). Maternal occupational exposure to noise during pregnancy and hearing dysfunction in children: A nationwide prospective cohort study in Sweden. *Environmental Health Perspectives*, 124(6), 855–860. <https://doi.org/10.1289/ehp.1509874>

Selander, J., Rylander, L., Albin, M., Rosenhall, U., Lewné, M., & Gustavsson, P. (2019). Full-time exposure to occupational noise during pregnancy was associated with reduced birth weight in a nationwide cohort study of Swedish women. *Science of the Total Environment*, 651, 1137–1143. <https://doi.org/10.1016/j.scitotenv.2018.09.212>

Shalool, A., Zainal, N., Gan, K. B., & Umat, C. (2017). An investigation of passive and active noise reduction using commercial and standard TDH-49 headphones. 2016 International Conference on Advances in Electrical, Electronic and Systems Engineering, ICAEES 2016, 606–609. <https://doi.org/10.1109/ICAEEES.2016.7888118>

Sharifzadeh Mirhsekarloo, M., Tan, C. Y., Zhang, L., Chen, S., Lai, S. C., Guo, S., & Yao, K. (2016). Transparent piezoelectric film speakers for active noise mitigation. Proceedings of the INTER-NOISE 2016 - 45th International Congress and Exposition on Noise Control Engineering: Towards a Quieter Future, 79–84.

Simos, J., Cantoreggi, N., Christie, D., & Forbat, J. (2019). Wind turbines and health: A review with suggested recommendations. *Environnement, Risques et Sante*, 18(2), 149–159. <https://doi.org/10.1684/ers.2019.1281>

Sinay, J., Balážiková, M., Dulebová, M., Markulík, Š., & Kotianová, Z. (2018). Measurement of low-frequency noise during CNC machining and its assessment. *Measurement: Journal of the International Measurement Confederation*, 119, 190–195. <https://doi.org/10.1016/j.measurement.2018.02.004>

Smith, M. G., Ögren, M., Ageborg Morsing, J., & Persson Waye, K. (2019). Effects of ground-borne noise from railway tunnels on sleep: A polysomnographic study. *Building and Environment*, 149(December 2018), 288–296. <https://doi.org/10.1016/j.buildenv.2018.12.009>

Song, X. D., Li, Q., & Wu, D. J. (2017). Study on structure-borne low-frequency noise from rail transit bridges using inverse boundary element method. *Procedia Engineering*, 199, 1380–1385. <https://doi.org/10.1016/j.proeng.2017.09.365>

Song, X. D., Wu, D. J., Li, Q., & Botteldooren, D. (2016). Structure-borne low-frequency noise from multi-span bridges: A prediction method and spatial distribution. *Journal of Sound and Vibration*, 367, 114–128. <https://doi.org/10.1016/j.jsv.2016.01.003>

Sousa, J., Monteiro, R., Tomé, D., & Rodrigues, M. A. (2019). Effects of Noise Frequency on Performance and Well-Being. *Occupational and Environmental Safety and Health*, 521–528.

St. George, L., Hobbs, S. J., Richards, J., Sinclair, J., Holt, D., & Roy, S. H. (2018). The effect of cut-off frequency when high-pass filtering equine sEMG signals during locomotion. *Journal of Electromyography and Kinesiology*, 43(March), 28–40. <https://doi.org/10.1016/j.jelekin.2018.09.001>

Stansfeld, S., & Clark, C. (2019). Mental Health Effects of Noise. *Encyclopedia of Environmental Health (Second Edition)*, 287–294.

Suzuki, F. A. de B., Suzuki, F. A., Onishi, E. T., & Penido, N. O. (2018). Psychoacoustic classification of persistent tinnitus. *Brazilian Journal of Otorhinolaryngology*, 84(5), 583–590. <https://doi.org/10.1016/j.bjorl.2017.07.005>

Tao, Z., Wang, Y., Zou, C., Li, Q., & Luo, Y. (2019). Assessment of ventilation noise impact from metro depot with over-track platform structure on workers and nearby inhabitants. *Environmental Science and Pollution Research*, 26(9), 9203–9218. <https://doi.org/10.1007/s11356-019-04378-w>

Taylor, J., & Klenk, N. (2019). The politics of evidence: Conflicting social commitments and environmental priorities in the debate over wind energy and public health. *Energy Research and Social Science*, 47(August 2018), 102–112. <https://doi.org/10.1016/j.erss.2018.09.001>

Tekeste, T., Saleh, H., Mohammad, B., & Ismail, M. (2019). Ultra-Low Power QRS Detection and ECG Compression Architecture for IoT Healthcare Devices. *IEEE Transactions on Circuits and Systems I: Regular Papers*, 66(2), 669–679. <https://doi.org/10.1109/TCSI.2018.2867746>

Tokashiki, T. (2017). Research on the effect of the aircraft noise pollution on the noise environment in Okinawa due to the U.S. Military Bases. INTER-NOISE 2017 – 46th International Congress and Exposition on Noise Control Engineering: Taming Noise and Moving Quiet, 2017-January.

Van Kamp, I., Breugelmans, O., Van Poll, R., Baliatsas, C., & Van Kempen, E. (2017). Determinants of annoyance from humming sound as indicator of low frequency noise. Proceedings of ACOUSTICS 2017 Perth: Sound, Science and Society - 2017 Annual Conference of the Australian Acoustical Society, AAS 2017, 2012(1), 1–7.

van Kamp, I., & van den Berg, F. (2018). Health Effects Related to Wind Turbine Sound, Including Low-Frequency Sound and Infrasound. *Acoustics Australia*, 46(1), 31–57. <https://doi.org/10.1007/s40857-017-0115-6>

Van Renterghem, T. (2019). Towards explaining the positive effect of vegetation on the perception of environmental noise. *Urban Forestry and Urban Greening*, 40, 133–144. <https://doi.org/10.1016/j.ufug.2018.03.007>

Vasilyeva, I. N., Bepalov, V. G., Semenov, A. L., Baranenko, D. A., & Zinkin, V. N. (2017). The Effects of Low-Frequency Noise on Rats: Evidence of Chromosomal Aberrations in the Bone Marrow Cells and the Release of Low-Molecular-Weight DNA in the Blood Plasma. *Noise and Health*. [https://doi.org/10.4103/nah.NAH\\_39\\_16](https://doi.org/10.4103/nah.NAH_39_16)

Venet, T., Carreres-Pons, M., Chalansonnet, M., Thomas, A., Merlen, L., Nunge, H., ... Campo, P. (2017). Continuous exposure to low-frequency noise and carbon disulfide: Combined effects on hearing. *NeuroToxicology*, 62, 151–161. <https://doi.org/10.1016/j.neuro.2017.06.013>

Walker, E. D., Brammer, A., Cherniack, M. G., Laden, F., & Cavallari, J. M. (2016). Cardiovascular and stress responses to short-term noise exposures—A panel study in healthy males. *Environmental Research*, 150, 391–397. <https://doi.org/10.1016/j.envres.2016.06.016>

Walker, E. D., Hart, J. E., Koutrakis, P., Cavallari, J. M., VoPham, T., Luna, M., & Laden, F. (2017). Spatial and temporal determinants of A-weighted and frequency specific sound levels—An elastic net approach. *Environmental Research*, 159(August), 491–499. <https://doi.org/10.1016/j.envres.2017.08.034>

Wallner, P., Hutter, H. P., & Moshhammer, H. (2019). Evaluating an 80 Hz tonal noise from a hydropower plant. *International Journal of Occupational Medicine and Environmental Health*, 32(3), 401–411. <https://doi.org/10.13075/ijomeh.1896.01361>

Wang, C., Gao, H., Yu, L., Yu, T., Yan, W., & Xue, Q. (2016). Portable Low-Frequency Noise Reduction Device for Both Small Open and Closed Spaces. *Shock and Vibration*, 2016. <https://doi.org/10.1155/2016/6241935>

Wang, C., Li, Z., Pan, Z., & Li, D. (2018). A high-performance optoelectronic sensor device for nitrate nitrogen in recirculating aquaculture systems. *Sensors (Switzerland)*, 18(10). <https://doi.org/10.3390/s18103382>

Wang, V. S., Lo, E. W., Liang, C. H., Chao, K. P., Bao, B. Y., & Chang, T. Y. (2016). Temporal and spatial variations in road traffic noise for different frequency components in metropolitan Taichung, Taiwan. *Environmental Pollution*, 219, 174–181. <https://doi.org/10.1016/j.envpol.2016.10.055>

Wang, X., Lai, Y., Zhang, X., & Zhao, J. (2018). Effect of low-frequency but high-intensity noise exposure on swine brain blood barrier permeability and its mechanism of injury. *Neuroscience Letters*, 662, 122–128. <https://doi.org/10.1016/j.neulet.2017.09.040>

Wayalun, P., Saiyod, S., & Chamadol, N. (2018). Enhancement of bile duct ultrasound images for Cholangiocarcinoma surveillance. *Malaysian Journal of Computer Science*, 31(4), 238–254. <https://doi.org/10.22452/mjcs.vol31no4.1>

Williamson, A. (2016). Community noise investigation of a “low level thrumming” attributed to the operation of a mine, 1–16.

Wu, D., Zhang, N., Mak, C. M., & Cai, C. (2019). Hybrid noise control using multiple Helmholtz resonator arrays. *Applied Acoustics*, 143, 31–37. <https://doi.org/10.1016/j.apacoust.2018.08.023>

Yan, S., Li, C., Xia, Y., & Li, G. (2019). Analysis and prediction of nature gas noise in a metering station based on CFD. *Engineering Failure Analysis*, 108(April), 104296. <https://doi.org/10.1016/j.engfailanal.2019.104296>

Zagubien, A., & Koszalinska, P. (2016). Non-occupational exposure of low frequency noise, the analysis on the basis of chosen means of transport.

Zagubień, A., & Wolniewicz, K. (2019). The impact of supporting tower on wind turbine noise emission. *Applied Acoustics*, 155, 260–270. <https://doi.org/10.1016/j.apacoust.2019.05.032>

Zajamšek, B., Hansen, K. L., Doolan, C. J., & Hansen, C. H. (2016). Characterisation of wind farm infrasound and low-frequency noise. *Journal of Sound and Vibration*, 370, 176–190. <https://doi.org/10.1016/j.jsv.2016.02.001>



Zare, S., Baneshi, M. R., Hemmatjo, R., Ahmadi, S., Omidvar, M., & Dehaghi, B. F. (2019). The Effect of Occupational Noise Exposure on Serum Cortisol Concentration of Night-shift Industrial Workers: A Field Study. *Safety and Health at Work*, 10(1), 109–113. <https://doi.org/10.1016/j.shaw.2018.07.002>

Zeitooni, M., Mäki-Torkko, E., & Stenfelt, S. (2016). Binaural Hearing Ability with Bilateral Bone Conduction Stimulation in Subjects with Normal Hearing: Implications for Bone Conduction Hearing Aids. *Ear and Hearing*, 37(6), 690–702. <https://doi.org/10.1097/AUD.0000000000000336>

Zhai, C., Tang, Z., Zou, Q., & Qin, L. (2016). Experimental Study on the Noise Characteristics Regarding Axial Auxiliary Fans and the Noise Reduction Performance of Mufflers. *Arabian Journal for Science and Engineering*, 41(12), 4817–4826. <https://doi.org/10.1007/s13369-016-2165-8>

Zhang, X., Li, X., Hao, H., Wang, D., & Li, Y. (2016). A case study of interior low-frequency noise from box-shaped bridge girders induced by running trains: Its mechanism, prediction and countermeasures. *Journal of Sound and Vibration*, 367, 129–144. <https://doi.org/10.1016/j.jsv.2016.01.004>

Zhao, K., Okolo, P., Neri, E., Chen, P., Kennedy, J., & Bennett, G. J. (2019). Noise reduction technologies for aircraft landing gear-A bibliographic review. *Progress in Aerospace Sciences*, 112(February), 100589. <https://doi.org/10.1016/j.paerosci.2019.100589>

Zhou, G., & Fu, W. (2018). Total serum bilirubin levels and sensorineural hearing loss in the US adolescents: NHANES 2007–2010. *International Journal of Pediatric Otorhinolaryngology*, 105(October 2017), 20–26. <https://doi.org/10.1016/j.ijporl.2017.12.001>

Zhu, Y. wei, Zhu, F. wang, Zhang, Y. shan, & Wei, Q. guo. (2017). The research on semi-active muffler device of controlling the exhaust pipe's low-frequency noise. *Applied Acoustics*, 116, 9–13. <https://doi.org/10.1016/j.apacoust.2016.09.011>

Žiaran, S., & Chlebo, O. (2016). Noise control transmission methods of the combustion engine by means of reduction of the vibration. *Archives of Acoustics*, 41(2), 277–284. <https://doi.org/10.1515/aoa-2016-0027>

Ziaran, S., Hucko, B., Chlebo, O., & Turna, J. (2019). Impact of vibro-isolation of technical equipment on structure-borne noise in living areas. *Proceedings of the 26th International Congress on Sound and Vibration, ICSV 2019*.
